# Supplementary material for: Genetic structure and distribution of Parisotoma notabilis (Collembola) in Europe: Cryptic diversity, split of lineages and colonization patterns
Source: PLOS journal article supplement (doi:10.1371/journal.pone.0170909), 2017-02-07
Supplement: S6 (10.1371/journal.pone.0170909.s006) [file journal.pone.0170909.s006]

**S2 Table. Values to estimate speciation among parthenogenetic lineages (Birky's 4x rule) for the five genetic lineages of *Parisotoma notabilis* sampled in Europe.** Lineages correspond to nodes connecting clades in Figure 2B, Lineages 1.1 and 1.2 are the two sister clades of Lineage 1 with 26 (L1.1) and 19 (L1.2) individuals. Nucleotide diversity ( $\pi$ ), pairwise difference between sequences (d), number of individuals (n), sequence length (L) and nucleotide diversity estimator ( $\theta$ ). Calculations are based on genetic distances and the phylogeny generated with 120 individuals and a 709 bp fragment of COI. The estimator of nucleotide diversity  $\theta$  was calculated as  $\pi/(1-4\pi/3)$ .

|                    | $\pi$ | $\theta$ | d     | n   | L   |
|--------------------|-------|----------|-------|-----|-----|
| <b>Lineage 0</b>   | 0.00  | 0.00     | 0.00  | 12  | 709 |
| <b>Lineage 1.1</b> | 2.35  | -0.84    | 2.26  | 26  | 709 |
| <b>Lineage 1.2</b> | 0.37  | -2.32    | 0.35  | 19  | 709 |
| <b>Lineage 2</b>   | 3.51  | -0.81    | 3.44  | 53  | 709 |
| <b>Lineage 3</b>   | 3.00  | -0.82    | 2.40  | 5   | 709 |
| <b>Lineage 4</b>   | 2.5   | -0.83    | 2.00  | 5   | 709 |
| <b>Lineage1</b>    | 4.78  | -0.75    | 4.67  | 45  | 709 |
| <b>Lineage 0-1</b> | 41.52 | -0.75    | 40.79 | 57  | 709 |
| <b>Lineage 0-2</b> | 69.75 | -0.75    | 69.12 | 110 | 709 |
| <b>Lineage 3-4</b> | 71.58 | -0.75    | 64.42 | 10  | 709 |
