# Supplementary material for: Genetic structure and distribution of Parisotoma notabilis (Collembola) in Europe: Cryptic diversity, split of lineages and colonization patterns
Source: PLOS journal article supplement (doi:10.1371/journal.pone.0170909), 2017-02-07
Supplement: S7 (10.1371/journal.pone.0170909.s007) [file journal.pone.0170909.s007]

**S3 Table. K/θ between highly supported clades of *Parisotoma notabilis* from Europe to estimate K for Birky's 4x rule.**  $K/\theta \geq 4$  indicate that samples are from different species and  $K/\theta \leq 4$  indicate that samples are from the same species. K is the observed sequence distance d from S2 Table corrected for multiple hits using GTR+G+I as estimated by TOPALI.θ values correspond to S2 Table, if θ of two clades differed, the larger value was used.

|                  | <b>K/θ</b> | <b>K</b> |
|------------------|------------|----------|
| <b>L1.1/L1.2</b> | -3.34      | 7.75     |
| <b>L1.1/L0</b>   | -135.26    | 113.62   |
| <b>L1.2/L0</b>   | -47.32     | 109.79   |
| <b>L1/L0</b>     | -149.33    | 112      |
| <b>L0-L1/L2</b>  | -140.80    | 114.05   |
| <b>L3/L4</b>     | -152.27    | 114.2    |
| <b>L0-2/L3-4</b> | -160.88    | 120.66   |
